# Supplementary material
Source: publisher figshare collection journal article supplement (https://tandf.figshare.com/articles/dataset/_/8282327)
Supplement: Supplementary file 2 [file 1]

Archive with 5 entries (5 files):
- Movie S1.mp4
- Movie S2.mp4
- Movie S3.mp4
- Movie S4.mp4
- supplementary_production.pdf
